# Supplementary material
Source: PubMed Central journal article supplement (PMC3098705)

supplementary figure 1

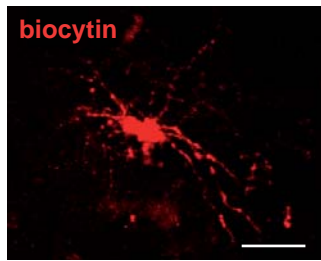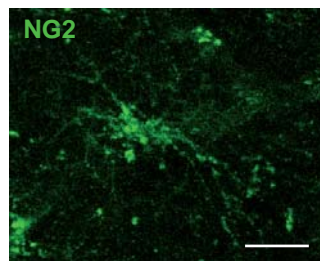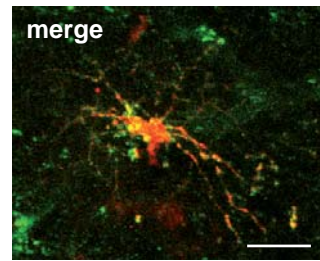

Supplementary figure 2

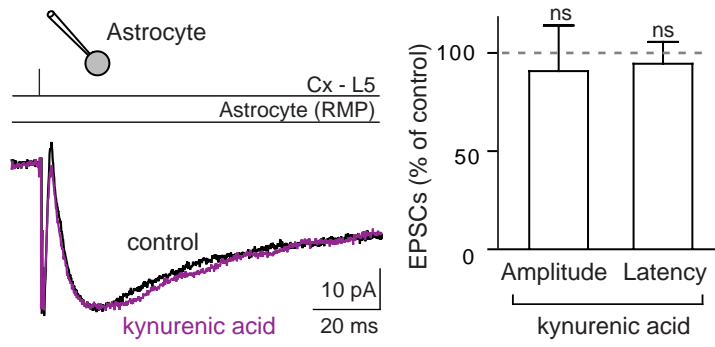

Supplement: tjp0589-2301-SD1.pdf [file tjp0589-2301-SD1.pdf]
